# Supplementary material for: Cell-specific responses of Anopheles gambiae fat body to blood feeding and infection at a single nuclei resolution
Source: Research Square preprint supplement (doi:10.21203/rs.3.rs-7151993/v1), 2025-07-29
Supplement: Supplementary file 9 [file e724dbd4d5cff18e70316190.docx]

**Supplementary Table Legends**

**Supplementary Table 1. Marker genes for each *Anopheles gambiae* fat body cluster.** This table lists marker genes identified for each fat body cell cluster, including cluster identifiers, average of log₂ fold change (Avg log2FC > 0.5), adjusted p-values (P val adj < 0.05), percentage of cells expressing each gene, and VectorBase AGAP accession numbers.

**Supplementary Table 2. Distribution of captured single cells across samples and clusters.** This file shows the number of cells assigned to each cluster for every individual sample, as identified in the single-nuclei analysis. It provides an overview of cell representation and cluster composition per sample.

**Supplementary Table 3. Differentially expressed transcripts in naïve and *Plasmodium berghei*-challenged *Anopheles gambiae* fat body.** This table lists transcripts identified as differentially expressed in bulk RNA-seq analyses of fat body tissue from naïve and *P. berghei*-challenged *An. gambiae*. Criteria for differential expression include log₂ fold change (logFC > 0.5 or logFC < -0.5) and false discovery rate (FDR < 0.05).

**Supplementary Table 4. Differentially expressed genes in granulocytes (Hm1) from naïve and *Plasmodium berghei*-challenged *Anopheles gambiae*.** This table presents genes identified as differentially expressed in single-nucleus RNA-seq analyses analysis of oenocytes (Oe) and granulocytes (Hm1) isolated from fat body tissue from naïve and *P. berghei*-challenged *An. gambiae*. Differential expression was determined using an average log₂ fold change (Avg log2FC > 0.5 or Avg log2FC < -0.5) and false discovery rate (P val adj < 0.05).

**Supplementary Table 5. Differentially expressed transcripts in control and bacteria-injected *Anopheles gambiae* fat body.** This table lists transcripts identified as differentially expressed in bulk RNA-seq analyses of fat body tissue from control and bacteria-injected *An. gambiae*. Criteria for differential expression include log₂ fold change (logFC > 1 or logFC < -1) and false discovery rate (FDR < 0.05).

**Supplementary Table 6. Differentially expressed genes in trophocytes (T1-T4), hemocytes (Hm1 and Hm2), epidermal cells (EC), and pericardial cells (PC) from control and bacteria-injected *Anopheles gambiae*.** This table presents genes identified as differentially expressed in single-nucleus RNA-seq analyses analysis of in trophocytes (T1-T4), hemocytes (Hm1 and Hm2), epidermal cells (EC), and pericardial cells (PC)isolated from fat body tissue from control and bacteria-injected *An. gambiae*. Differential expression was determined using an average log₂ fold change (Avg log2FC > 1 or Avg log2FC < -1) and false discovery rate (P val adj < 0.05).

**Supplementary Table 7. Differentially expressed genes in T1 and T5 trophocytes from sugar-fed and 24-hour post-blood meal *Anopheles gambiae*.** This table presents genes identified as differentially expressed in single-nucleus RNA-seq analyses analysis of T1 and T5 trophocytes isolated from fat body tissue of sugar-fed and 24-hours post-blood meal *An. gambiae*. Differential expression was determined using an average log₂ fold change (Avg log2FC > 1 or Avg log2FC < -1) and false discovery rate (P val adj < 0.05).

**Supplementary Table 8. Differentially expressed transcripts in sugar-fed and 24-hour post-blood meal *Anopheles gambiae* fat body.** This table lists transcripts identified as differentially expressed in bulk RNA-seq analyses of fat body tissue sugar-fed and 24-hour post-blood meal *An. gambiae*. Criteria for differential expression include log₂ fold change (logFC > 1 or logFC < -1) and false discovery rate (FDR < 0.01).
